# Supplementary material
Source: MDPI journal article supplement (https://www.mdpi.com/2227-7099/10/2/49)
Supplement: s1 [file s1]

Archive with 2 entries (2 files):
- Supplementary Materials_Figure.pdf
- Supplementary Materials_Table.pdf
