# Supplementary material
Source: MDPI journal article supplement (https://www.mdpi.com/2227-7099/10/2/49)
Supplement: s1 [file s1 › Supplementary Materials_Table.pdf]

**Table S1.** Effect of scarification and media on *Indigofera spp.* seed germination percentage.

| Seed Scarification                  | Media             | Germination Percentage |
|-------------------------------------|-------------------|------------------------|
| Control (without scarification)     | Soil              | 28.00                  |
|                                     | <b>Sand</b>       | <b>73.33</b>           |
|                                     | Soil + sand (1:1) | 42.00                  |
| Soaked in water for 24 hours        | Soil              | 35.33                  |
|                                     | <b>Sand</b>       | <b>77.33</b>           |
|                                     | Soil + sand (1:1) | 43.33                  |
| Soaked in coconut water for 3 hours | Soil              | 30.67                  |
|                                     | <b>Sand</b>       | <b>88.00</b>           |
|                                     | Soil + sand (1:1) | 34.67                  |

**Tabel S2.** The effect of media on germination percentage.

| Treatment (Media) | Germination Percentage (%) |
|-------------------|----------------------------|
| <b>Sand</b>       | <b>79.56 a ± 11.88</b>     |
| Soil + sand (1:1) | 40.00 b ± 7.24             |
| Soil              | 31.33 b ± 5.81             |

Remark: Means followed by the same letter are not significantly different at  $P \leq 0.05$  as determined by DMRT.

**Table S3.** Effect of shade and media on growth parameters of height, diameter, number of branches, number of leaves, and survival rate of *Indigofera spp.* seedlings.

| Treatment |                                            | Height<br>(cm)     | Diameter<br>(cm)     | Number<br>of<br>Branches | Number<br>of<br>Leaves<br>(g) | Survival<br>(%)      | Biomass<br>(g)        | TR Ratio             | Seed Quality<br>Index  |
|-----------|--------------------------------------------|--------------------|----------------------|--------------------------|-------------------------------|----------------------|-----------------------|----------------------|------------------------|
| Shading   | Media                                      |                    |                      |                          |                               |                      |                       |                      |                        |
| 0%        | soil                                       | 5.51 ± 0.63        | ± 0.12 ± 0.02        | 1.88 ± 0.29              | 6.83 ± 1.30                   | 100.00 ± 0.00        | 0.0578 ± 0.013        | 5.1654 ± 9.05        | 0.0019 ± 0.0007        |
|           | soil+cocopeat (1:1)                        | 6.17 ± 0.29        | ± 0.13 ± 0.02        |                          | 9.42 ± 1.08                   | 94.44 ± 4.22         | 0.0392 ± 0.011        | 5.3834 ± 3.82        |                        |
|           | soil + rice husk charcoal (1:2)            | <b>8.83</b> ± 0.89 | ± <b>0.18</b> ± 0.04 | <b>4.55</b> ± 0.47       | <b>17.96</b> ± 2.39           | 100.00 ± 2.72        | 0.0559 ± 0.016        | 3.7587 ± 6.17        | 0.0018 ± 0.0006        |
|           | soil + cocopeat + rice husk charcoal (1:2) | 5.34 ± 0.32        | ± 0.10 ± 0.02        |                          | 8.87 ± 1.14                   | 100.00 ± 0.00        | <b>0.0768</b> ± 0.051 | <b>5.5338</b> ± 8.26 |                        |
|           | soil                                       | 5.99 ± 0.75        | ± 0.09 ± 0.02        | 2.11 ± 0.46              | 7.68 ± 2.11                   | 97.77 ± 3.44         | 0.0530 ± 0.017        | 4.7613 ± 5.30        | 0.0018 ± 0.0005        |
|           | soil+cocopeat (1:1)                        | 6.12 ± 0.42        | ± 0.11 ± 0.02        |                          | 9.30 ± 1.37                   | 98.88 ± 3.44         | 0.0482 ± 0.009        | 3.6370 ± 5.37        |                        |
|           | soil + rice husk charcoal (1:2)            | <b>7.72</b> ± 0.44 | ± <b>0.15</b> ± 0.06 | <b>3.99</b> ± 0.26       | <b>15.67</b> ± 1.77           | <b>100.00</b> ± 0.00 | <b>0.0798</b> ± 0.021 | <b>4.7209</b> ± 3.64 | <b>0.0030</b> ± 0.0012 |
|           | soil + cocopeat + rice husk charcoal (1:2) | 5.69 ± 0.39        | ± 0.16 ± 0.04        |                          | 8.86 ± 1.26                   | 100.00 ± 0.00        | 0.0265 ± 0.003        | 3.1010 ± 1.88        |                        |
|           | Soil                                       | 4.18 ± 0.27        | ± 0.07 ± 0.03        | 1.23 ± 0.23              | 3.37 ± 0.68                   | 97.77 ± 3.44         | 0.0116 ± 0.001        | 3.3714 ± 3.46        | 0.0006 ± 0.0001        |
|           | soil+cocopeat (1:1)                        | 5.78 ± 0.47        | ± 0.08 ± 0.03        |                          | 10.16 ± 0.87                  | 100.00 ± 0.00        | 0.0269 ± 0.015        | 2.5355 ± 3.53        |                        |
| 70%       | soil + rice husk charcoal (1:2)            | <b>6.89</b> ± 0.60 | ± 0.14 ± 0.02        | <b>3.97</b> ± 0.26       | <b>16.13</b> ± 1.14           | 98.80 ± 3.44         | 0.0343 ± 0.013        | 3.3971 ± 2.23        | 0.0012 ± 0.0005        |

| Treatment |                                                        | Height<br>(cm) | Diameter<br>(cm) | Number<br>of<br>branches | Number<br>of<br>leaves<br>(g) | Survival<br>(%) | Biomass<br>(g)    | TR Ratio         | Seed Quality<br>Index |
|-----------|--------------------------------------------------------|----------------|------------------|--------------------------|-------------------------------|-----------------|-------------------|------------------|-----------------------|
| Shading   | Media                                                  |                |                  |                          |                               |                 |                   |                  |                       |
|           | soil +<br>cocopeat +<br>rice husk<br>charcoal<br>(1:2) | 4.67 ±<br>0.21 | 0.09<br>±0.01    | 2.28 ±0.21               | 7.76<br>±0.79                 | 100.00<br>±2.72 | 0.0159<br>± 0.005 | 1.6933 ±<br>3.15 | 0.0008 ± 0.0002       |

**Table S4.** Effect of spacing and application of manure to increase growth in height, diameter, and the number of branches of *Indigofera* spp. four (4) months after planting.

| Treatments                        | Survival (%) | Height (cm)    | Diameter (mm) | Number of Branches |
|-----------------------------------|--------------|----------------|---------------|--------------------|
| Spacing                           | ns           | Ns             | ns            | Ns                 |
| 100 m x 100 cm                    | 100          | 25.868 ± 6.83  | 3.258 ± 0.75  | 6.438 ± 1.92       |
| 75 m x 75 cm                      | 100          | 20.836 ± 10.07 | 2.746 ± 0.32  | 4.744 ±1.61        |
| 50 m x 50 cm                      | 100          | 21.046 ± 6.76  | 3.080 ± 0.53  | 5.865 ± 2.19       |
| organic<br>fertilizer<br>(manure) | ns           | Ns             | ns            | Ns                 |
| Control (0 g)                     | 100          | 15.733 ± 8.79  | 2.161± 0.43   | 3.179 ± 1.80       |
| 100 g/tree                        | 100          | 19.031 ± 9.42  | 2.292 ± 0.56  | 4.667 ± 2.27       |
| 150 g/tree                        | 100          | 14.857 ± 6.53  | 2.244 ± 0.64  | 4.140 ± 1.94       |
| 200 g/tree                        | 100          | 18.128 ± 7.66  | 2.389 ± 0.74  | 4.521 ±2.06        |
| Interaction                       | ns           | Ns             | Ns            | Ns                 |

**Table S5.** Internal strategic factors based on weights, ratings, and scores.

| NO                            | INTERNAL FACTORS                                                                                                                                        | WEIGHTS | RATINGS | SCORE       |
|-------------------------------|---------------------------------------------------------------------------------------------------------------------------------------------------------|---------|---------|-------------|
| STRENGTHS                     |                                                                                                                                                         |         |         |             |
| 1                             | Communities in the region are accustomed to agricultural cultivation activities                                                                         | 0.130   | 4.00    | 0,52        |
| 2                             | <i>Indigofera</i> spp. grows naturally on Timor Island                                                                                                  | 0.030   | 3.00    | 0,09        |
| 3                             | High potential <i>Indigofera</i> spp. that grows naturally and can be collected by members of the community                                             | 0.020   | 3.00    | 0,06        |
| 4                             | Strong willingness of community members to participate in cultivating <i>Indigofera</i> spp., which is usually conducted through collective cooperation | 0.240   | 3.00    | 0,72        |
| 5                             | Wide availability of land suitable for the cultivation of <i>Indigofera</i> spp.                                                                        | 0.170   | 3.00    | 0,51        |
| 6                             | Communities have a strong cultural tradition of weaving using natural dyes                                                                              | 0.120   | 4.00    | 0,48        |
| 7                             | The use of <i>Indigofera</i> spp. is a natural dye is widely accepted as part of local cultural traditions, preceding the use of synthetic dyes         | 0.090   | 4.00    | 0,36        |
| Number of Strengths           |                                                                                                                                                         |         |         | <b>2,74</b> |
| WEAKNESS                      |                                                                                                                                                         |         |         |             |
| 1                             | Community members do not yet cultivate <i>Indigofera</i> spp., but gather it from the wild                                                              | 0.040   | 3000    | 0.12        |
| 2                             | Communities are not yet familiar with techniques for cultivating <i>Indigofera</i> spp.                                                                 | 0.060   | 3000    | 0.18        |
| 3                             | The process of producing natural dye from <i>Indigofera</i> spp. is more complicated than the process of producing other types of natural dyes          | 0.020   | 3000    | 0.06        |
| 4                             | Communities are not yet familiar with the processes for producing indigo paste of sufficient quality to compete with other products                     | 0.060   | 4000    | 0.24        |
| 5                             | Low general levels of education may constrain the transfer of knowledge related to the cultivation and processing techniques                            | 0.020   | 2000    | 0.04        |
| Number of Weakness            |                                                                                                                                                         |         |         | <b>0.64</b> |
| INTERNAL FACTOR VALUE (S - W) |                                                                                                                                                         |         |         | <b>2.10</b> |

**Table S6.** External strategic factors based on weights, ratings, and scores.

| NO                            | EXTERNAL FACTORS                                                                                                                                     | WEIGHTS | RATINGS | SCORE       |
|-------------------------------|------------------------------------------------------------------------------------------------------------------------------------------------------|---------|---------|-------------|
| <b>OPPORTUNITIES</b>          |                                                                                                                                                      |         |         |             |
| 1                             | Increased farmer incomes from the production of indigo paste from <i>Indigofera</i> spp. leaves                                                      | 0.120   | 3.00    | 0.36        |
| 2                             | Increased weaver incomes from the sale of cloth using natural dyes                                                                                   | 0.130   | 2.00    | 0.26        |
| 3                             | <i>Indigofera</i> spp. can be intercropped with food crops without negative impact on the growth of any of the crops involved                        | 0.020   | 3.00    | 0.06        |
| 4                             | <i>Indigofera</i> spp. has good potential for used to rehabilitate critical land                                                                     | 0.060   | 2.00    | 0.12        |
| 5                             | There are good prospective markets for indigo paste                                                                                                  | 0.040   | 3.00    | 0.12        |
| 6                             | The technology required for the production of indigo paste is available                                                                              | 0.090   | 3.00    | 0.27        |
| 7                             | Trend back to nature                                                                                                                                 | 0.060   | 3.00    | 0.18        |
| 8                             | Increased awareness of the need for environmental and occupational safety                                                                            | 0.170   | 3.00    | 0.51        |
| 9                             | Limited availability of plants that produce natural blue dye                                                                                         | 0.240   | 3.00    | 0.72        |
| Number of Opportunities       |                                                                                                                                                      |         |         | <b>2.60</b> |
| <b>THREATS</b>                |                                                                                                                                                      |         |         |             |
| 1                             | Unpredictable climatic conditions due to global climate change                                                                                       | 0.020   | 4000    | 0.08        |
| 2                             | The presence of synthetic dyes that makes weaving more efficient                                                                                     | 0.020   | 4000    | 0.08        |
| 3                             | Paste production is inefficient and manufacturing costs are high due to increased paste production not balanced by the availability of raw materials | 0.030   | 4000    | 0.12        |
| Number of Threats             |                                                                                                                                                      |         |         | <b>0.28</b> |
| EXTERNAL FACTOR VALUE (O - T) |                                                                                                                                                      |         |         | <b>2.32</b> |
