# Supplementary material
Source: MDPI journal article supplement (https://www.mdpi.com/2227-7099/10/2/49)

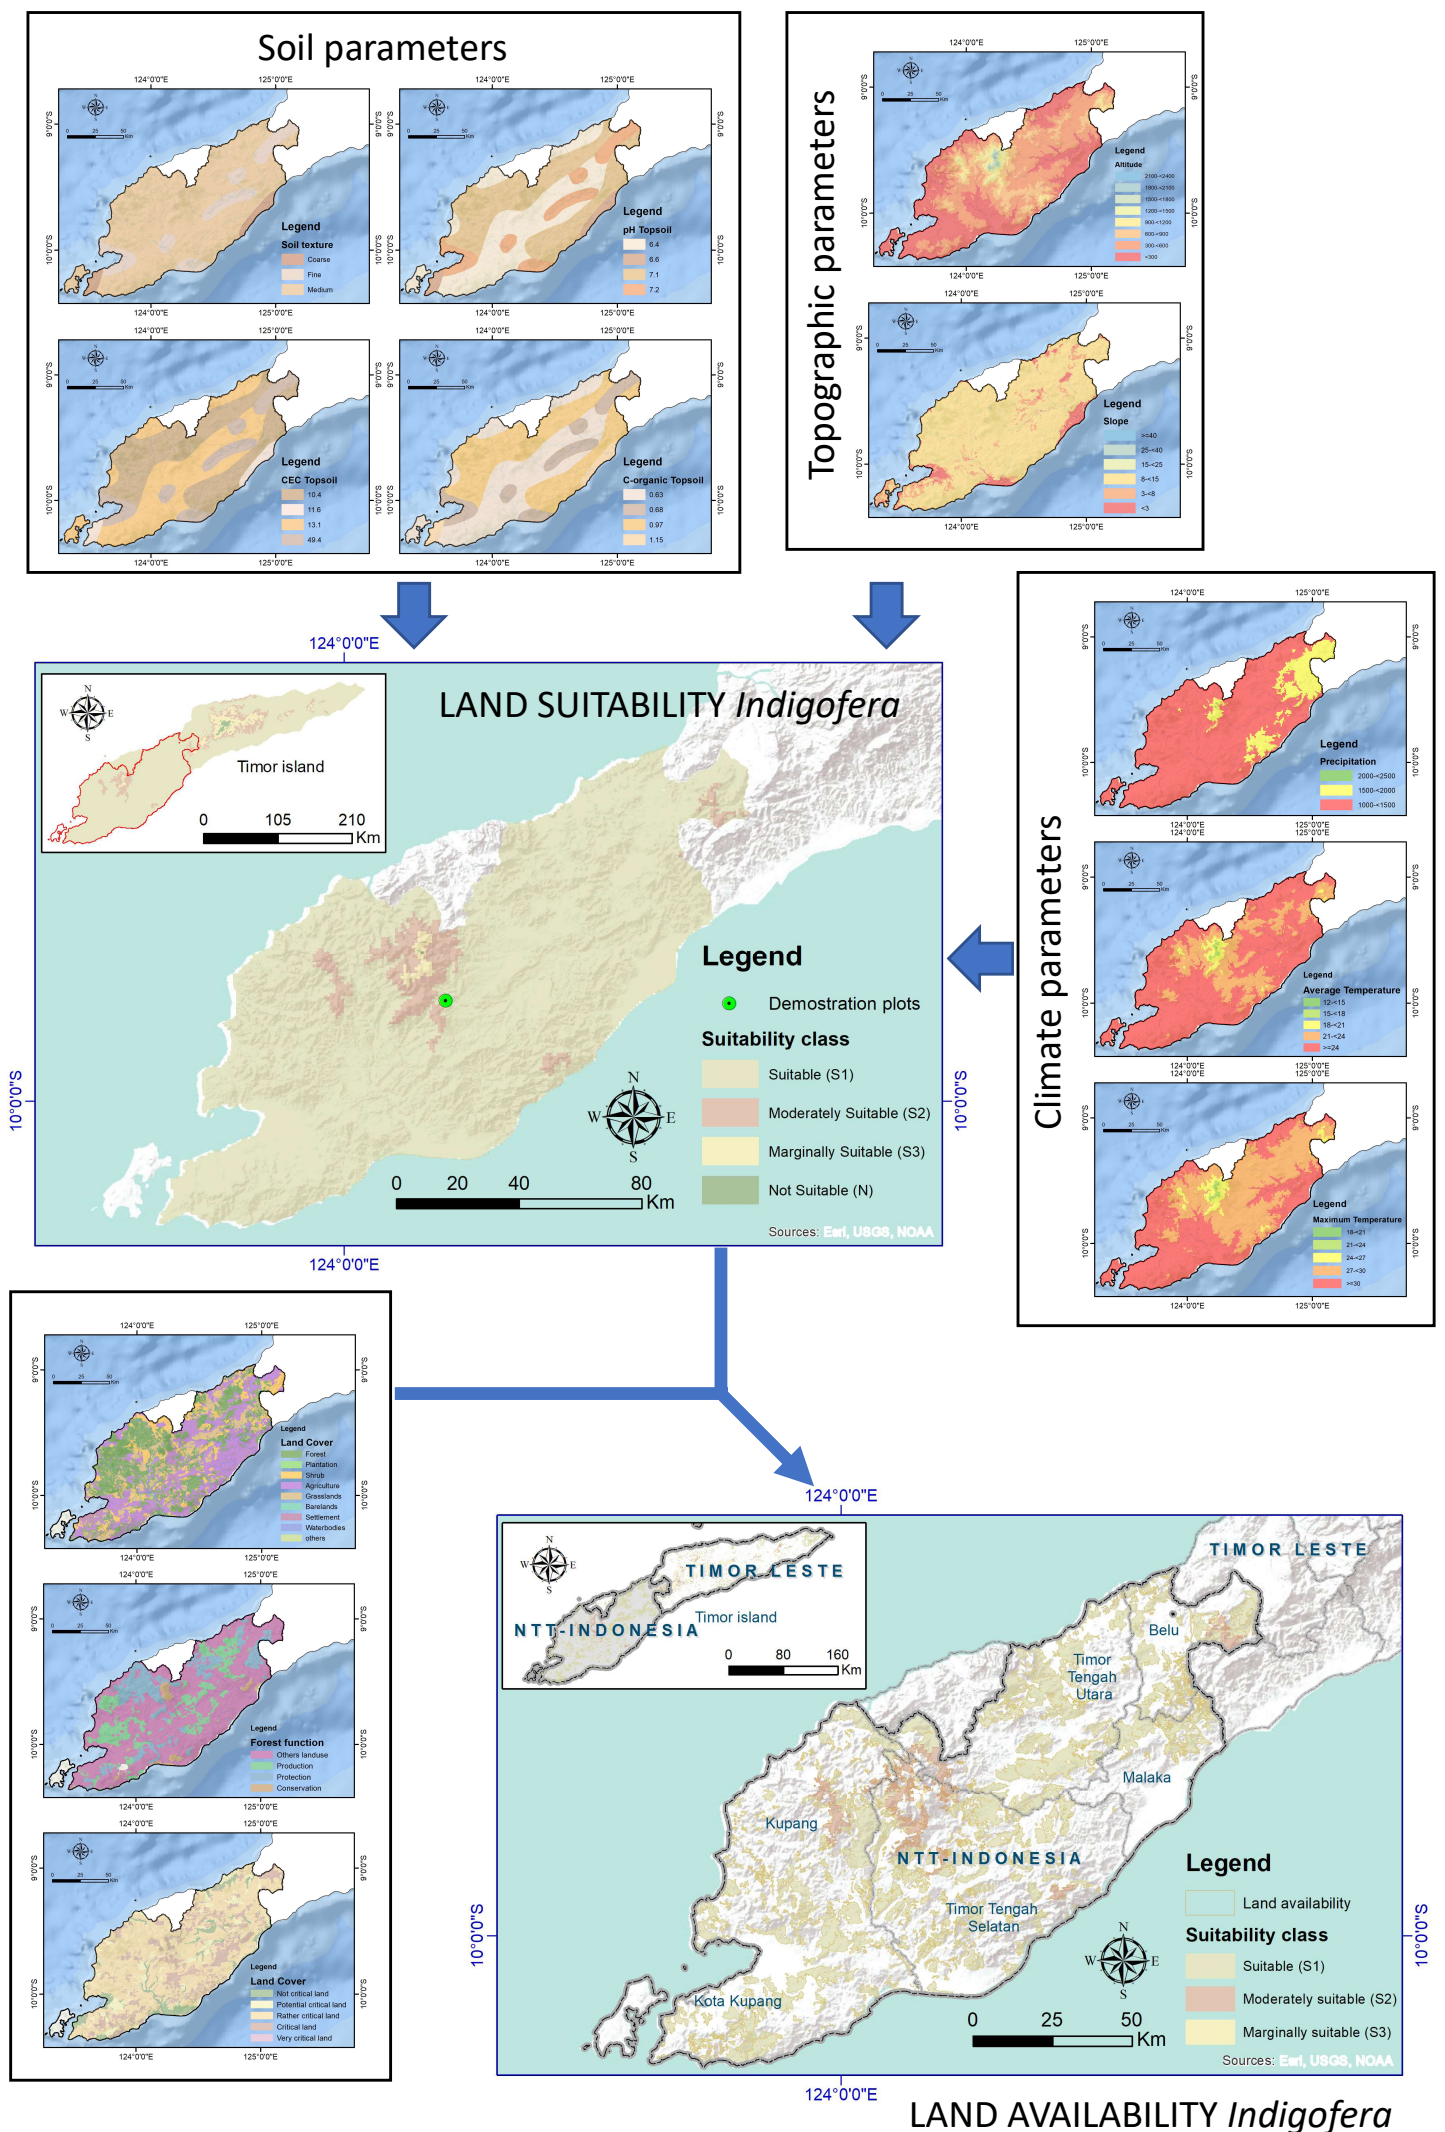

**Figure S1.** Steps for *Indigofera* Land Suitability - Land Availability Analysis.

Supplement: s1 [file s1 › Supplementary Materials_Figure.pdf]
